# Supplementary material for: Structures of two haptotropic isomers generated by the sliding of 1,3,5-triene ligands on a Pd–Pd–Pd chain
Source: Royal Society of Chemistry journal article supplement (doi:10.1039/b806824k), 2008-01-01
Supplement: b806824k.pdf [file b806824k.pdf]

## Supporting Materials

### **Structures of two haptotropic isomers generated by sliding of 1,3,5-triene ligands on a Pd–Pd–Pd Chain**

Tetsuro Murahashi,\* Yukari Mino, Koji Chiyoda, Sensuke Ogoshi, and Hideo Kurosawa

*Department of Applied Chemistry, Graduate School of Engineering,  
Osaka University, & PRESTO, Japan Science and Technology Agency (JST),  
Suita, Osaka, 565-0871, Japan*

## Experimental Details

### General Consideration.

All manipulations were conducted under a nitrogen atmosphere using standard Schlenk or drybox techniques.  $^1\text{H}$ ,  $^{13}\text{C}$  nuclear magnetic resonance spectra were recorded on 270 MHz (JEOL GSX-270) and 400 MHz (JEOL GSX-400) instruments. The chemical shifts were referenced to the residual resonances of deuterated solvents. Elemental analyses were performed at the Analytical Center, Faculty of Engineering, Osaka University. X-ray crystal data were collected by Rigaku RAXIS-RAPID Imaging Plate diffractometer. Unless specified, all reagents were purchased from commercial suppliers and used without purification.  $[\text{Pd}_2(\text{CH}_3\text{CN})_6][\text{BF}_4]_2$ ,  $\text{Pd}_2(\text{dba})_3$ , and DMVC were prepared according to the literature.<sup>1-3</sup>

### Synthesis of $[\text{Pd}_3(\mu_3\text{-DMVC})_2(\text{CH}_3\text{CN})_2][\text{BF}_4]_2$ (**1**)

To a solution of DMVC (= 1,2-di-(*E*)-carbomethoxyvinylcyclopentene) (236 mg, 1.00 mmol) in acetone (40 mL) was added  $[\text{Pd}_2(\text{CH}_3\text{CN})_6][\text{BF}_4]_2$  (127 mg, 0.200 mmol) and  $\text{Pd}_2(\text{dba})_3$  (104 mg, 0.100 mmol). The reaction mixture was stirred for 1.5 h at room temperature. The resultant reaction mixture was filtered, and benzene was added to the filtrate to give an orange precipitate. The precipitate was washed with benzene, *n*-hexane, and pentane to give an analytically pure orange powder of **1** (151 mg, 72% yield).  $^1\text{H}$  NMR (400 MHz,  $\text{CD}_3\text{NO}_2$ , 25 °C)  $\delta$  6.09 (d,  $J = 11.6$  Hz, 4H, H4), 4.23 (d,  $J = 11.6$  Hz, 4H, H3), 3.80 (s, 12H,  $\text{OCH}_3$ ), 2.84 (s, 6H,  $\text{CH}_3\text{CN}$ ), 2.68 (m, 4H, H2a), 1.54 (m, 2H, H1a), 1.41 (dd,  $J = 7.8$  Hz,  $J = 16.6$  Hz, 4H, H2b),  $-0.17$  (m, 2H, H1b).  $^{13}\text{C}\{^1\text{H}\}$  NMR (100.5 MHz,  $\text{CD}_3\text{NO}_2$ , 25 °C)  $\delta$  169.9 (s, C6), 130.0 (s,  $\text{CH}_3\text{CN}$ ), 115.7 (s, C3), 86.6 (s, C4), 73.4 (s, C5), 54.7 (s,  $\text{OCH}_3$ ), 36.8 (s, C2), 22.9 (s, C1), 4.4 (s,  $\text{CH}_3\text{CN}$ ). Anal. Calcd. for  $\text{C}_{30}\text{H}_{38}\text{B}_2\text{F}_8\text{O}_8\text{N}_2\text{Pd}_3$ : C, 34.40; H, 3.66; N, 2.67. Found C, 34.52; H, 3.64; N, 2.73.

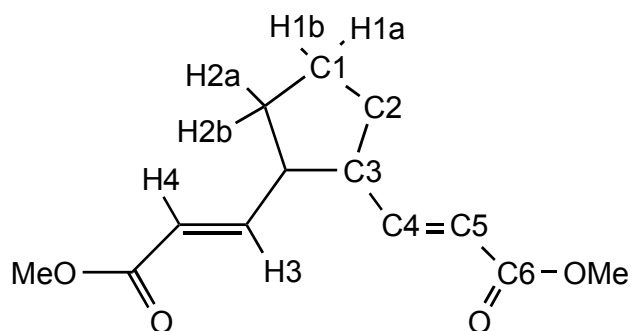

## Crystal structure determination

The teXsan program package<sup>4</sup> was used for refinement of the crystal data.

Crystal data for **s-1**:

### A. Crystal Data

|                                                                        |                                                                                                                   |
|------------------------------------------------------------------------|-------------------------------------------------------------------------------------------------------------------|
| Empirical Formula                                                      | C <sub>30</sub> H <sub>38</sub> O <sub>8</sub> F <sub>8</sub> B <sub>2</sub> N <sub>2</sub> Pd <sub>3</sub>       |
| Formula Weight                                                         | 1047.45                                                                                                           |
| Crystal Color, Habit                                                   | orange, prism                                                                                                     |
| Crystal Dimensions                                                     | 0.25 X 0.10 X 0.10 mm                                                                                             |
| Crystal System                                                         | monoclinic                                                                                                        |
| Lattice Type                                                           | Primitive                                                                                                         |
| No. of Reflections Used for Unit Cell Determination (2 $\theta$ range) | 10587 ( 4.4 - 55.0° )                                                                                             |
| Indexing Images                                                        | 2 oscillations at 2.5 minutes                                                                                     |
| Camera Radius                                                          | 127.40 mm                                                                                                         |
| Lattice Parameters                                                     | a = 10.3565(1) Å<br>b = 12.3481(3) Å<br>c = 14.3451(3) Å<br>$\beta$ = 95.920(2)°<br>V = 1824.71(6) Å <sup>3</sup> |
| Space Group                                                            | P2 <sub>1</sub> /n (#14)                                                                                          |
| Z value                                                                | 2                                                                                                                 |
| D <sub>calc</sub>                                                      | 1.906 g/cm <sup>3</sup>                                                                                           |
| F <sub>000</sub>                                                       | 1032.00                                                                                                           |
| $\mu$ (MoK $\alpha$ )                                                  | 15.55 cm <sup>-1</sup>                                                                                            |

### B. Intensity Measurements

|                  |                                                                 |
|------------------|-----------------------------------------------------------------|
| Diffractionmeter | Rigaku RAXIS-RAPID Imaging Plate                                |
| Radiation        | MoK $\alpha$ ( $\lambda$ = 0.71069 Å)<br>graphite monochromated |

|                                                           |                                                                         |
|-----------------------------------------------------------|-------------------------------------------------------------------------|
| Temperature                                               | 20.0 °C                                                                 |
| Voltage, Current                                          | 50 kV, 40 mA                                                            |
| Collimator Size                                           | 0.8 mm                                                                  |
| Detector Aperture                                         | 270.0 mm x 256.0 mm                                                     |
| Data Images                                               | 44 exposures at 0.7 minutes per degree                                  |
| Oscillation Range ( $\phi=0.0^\circ, \chi=45.0^\circ$ )   | $\omega$ 130.0 - 190.0° with 5.0° step                                  |
| Oscillation Range ( $\phi=180.0^\circ, \chi=45.0^\circ$ ) | $\omega$ 0.0 - 160.0° with 5.0° step                                    |
| Camera Radius                                             | 127.40 mm                                                               |
| Pixel Size                                                | 0.125 mm                                                                |
| $2\theta_{max}$                                           | 55.0°                                                                   |
| No. of Reflections Measured                               | Total: 16626<br>Unique: 4167 ( $R_{int} = 0.072$ )                      |
| Corrections                                               | Lorentz-polarization<br>Absorption<br>(trans. factors: 0.6531 - 0.8560) |

### C. Structure Solution and Refinement

|                                                    |                                                                                        |
|----------------------------------------------------|----------------------------------------------------------------------------------------|
| Structure Solution                                 | Direct Methods (SIR92)                                                                 |
| Refinement                                         | Full-matrix least-squares (SHELXL-97)                                                  |
| Function Minimized                                 | $\Sigma w(F_o^2 - F_c^2)^2$                                                            |
| Least Squares Weights                              | $w = [\sigma^2(F_o^2) + (0.1000P)^2 + 0.0000P]^{-1}$<br>where $P = (F_o^2 + 2F_c^2)/3$ |
| No. of Reflections (All, $2\theta < 54.96^\circ$ ) | 2480                                                                                   |
| No. Variables                                      | 241                                                                                    |
| Reflection/Parameter Ratio                         | 10.29                                                                                  |
| Residuals: R; Rw                                   | 0.051 ; 0.143                                                                          |
| Goodness of Fit Indicator                          | 0.76                                                                                   |
| Max Shift/Error in Final Cycle                     | -0.06                                                                                  |

## Crystal data for *u-1*:

### A. Crystal Data

|                                                                        |                                                                                                                                                                  |
|------------------------------------------------------------------------|------------------------------------------------------------------------------------------------------------------------------------------------------------------|
| Empirical Formula                                                      | C <sub>30</sub> H <sub>38</sub> O <sub>8</sub> Pd <sub>3</sub> B <sub>2</sub> F <sub>8</sub> N <sub>2</sub>                                                      |
| Formula Weight                                                         | 1047.45                                                                                                                                                          |
| Crystal Color, Habit                                                   | yellow, prism                                                                                                                                                    |
| Crystal Dimensions                                                     | 0.10 X 0.10 X 0.10 mm                                                                                                                                            |
| Crystal System                                                         | triclinic                                                                                                                                                        |
| Lattice Type                                                           | Primitive                                                                                                                                                        |
| No. of Reflections Used for Unit Cell Determination (2 $\theta$ range) | 3645 ( 4.7 - 54.9° )                                                                                                                                             |
| Indexing Images                                                        | 2 oscillations at 5.0 minutes                                                                                                                                    |
| Camera Radius                                                          | 127.40 mm                                                                                                                                                        |
| Lattice Parameters                                                     | a = 10.0065(1) Å<br>b = 11.0597(8) Å<br>c = 8.7843(8) Å<br>$\alpha$ = 96.218(6)°<br>$\beta$ = 94.476(5)°<br>$\gamma$ = 68.120(6)°<br>V = 896.1(1) Å <sup>3</sup> |
| Space Group                                                            | P1 (#2)                                                                                                                                                          |
| Z value                                                                | 1                                                                                                                                                                |
| D <sub>calc</sub>                                                      | 1.941 g/cm <sup>3</sup>                                                                                                                                          |
| F <sub>000</sub>                                                       | 516.00                                                                                                                                                           |
| $\mu$ (MoK $\alpha$ )                                                  | 15.83 cm <sup>-1</sup>                                                                                                                                           |

### B. Intensity Measurements

|                |                                  |
|----------------|----------------------------------|
| Diffractometer | Rigaku RAXIS-RAPID Imaging Plate |
|----------------|----------------------------------|

|                                                           |                                                                            |
|-----------------------------------------------------------|----------------------------------------------------------------------------|
| Radiation                                                 | MoK $\alpha$ ( $\lambda = 0.71069 \text{ \AA}$ )<br>graphite monochromated |
| Temperature                                               | 23.0 °C                                                                    |
| Voltage, Current                                          | 50 kV, 40 mA                                                               |
| Collimator Size                                           | 0.3 mm                                                                     |
| Detector Aperture                                         | 270.0 mm x 256.0 mm                                                        |
| Data Images                                               | 44 exposures at 2.0 minutes per degree                                     |
| Oscillation Range ( $\phi=0.0^\circ, \chi=45.0^\circ$ )   | $\omega$ 130.0 - 190.0° with 5.0° step                                     |
| Oscillation Range ( $\phi=180.0^\circ, \chi=45.0^\circ$ ) | $\omega$ 0.0 - 160.0° with 5.0° step                                       |
| Camera Radius                                             | 127.40 mm                                                                  |
| Pixel Size                                                | 0.125 mm                                                                   |
| $2\theta_{max}$                                           | 55.0°                                                                      |
| No. of Reflections Measured                               | Total: 7764<br>Unique: 3985 ( $R_{int} = 0.096$ )                          |
| Corrections                                               | Lorentz-polarization<br>Absorption<br>(trans. factors: 0.2500 - 0.8536)    |

### C. Structure Solution and Refinement

|                                                    |                                                                                        |
|----------------------------------------------------|----------------------------------------------------------------------------------------|
| Structure Solution                                 | Patterson Methods (DIRDIF94 PATTY)                                                     |
| Refinement                                         | Full-matrix least-squares (SHELXL-97)                                                  |
| Function Minimized                                 | $\Sigma w(F_o^2 - F_c^2)^2$                                                            |
| Least Squares Weights                              | $w = [\sigma^2(F_o^2) + (0.1000P)^2 + 0.0000P]^{-1}$<br>where $P = (F_o^2 + 2F_c^2)/3$ |
| No. of Reflections (All, $2\theta < 54.96^\circ$ ) | 2078                                                                                   |
| No. Variables                                      | 277                                                                                    |
| Reflection/Parameter Ratio                         | 7.50                                                                                   |
| Residuals: R; Rw                                   | 0.081 ; 0.221                                                                          |
| Goodness of Fit Indicator                          | 1.05                                                                                   |
| Max Shift/Error in Final Cycle                     | -0.16                                                                                  |

## References

1. T. Murahashi, T. Nagai, T. Okuno, T. Matsutani, H. Kurosawa, *Chem. Commun.* **2000**, 1689.
2. H. Ukai, H. Kawazura, Y. Ishii, *J. Organomet. Chem.* **1974**, *65*, 253.
3. K. Voigt, P. von Zezschwitz, K. Rosauer, A. Lansky, A. Adams, O. Reiser, A. de Meijere, *Eur. J. Org. Chem.* **1998**, 1521.
4. Crystal Structure Analysis Package, Molecular Structure Corporation, 1985 and 1999.
